# Supplementary material for: Improved conductivity and ionic mobility in nanostructured thin films via aliovalent doping for ultra-high rate energy storage
Source: Royal Society of Chemistry journal article supplement (doi:10.1039/d0na00160k), 2020-01-01
Supplement: d0na00160k1.pdf [file d0na00160k1.pdf]

# **Improved Conductivity and Ionic Mobility in Nanostructured Thin Films via Aliovalent Doping for Ultra-High Rate Energy Storage**

Nanoscale Advances

Clayton T. Kacica, Pratim Biswas\*

Aerosol and Air Quality Research Laboratory

Center for Aerosol Science and Engineering

Department of Energy, Environmental, and Chemical Engineering

Washington University in St. Louis

St. Louis, MO 63130 (USA)

**Supplemental Table S1**      *Literature review of doped-TiO<sub>2</sub> materials of various morphologies and dopants.*

| Morphology         | Dopant | Cycling Rates               | Performance                                        | Reference          |
|--------------------|--------|-----------------------------|----------------------------------------------------|--------------------|
| Solid sphere       | Nb     | 0.1 – 50 C                  | 120 mAh g <sup>-1</sup> at 50 C                    | [1] <sup>1</sup>   |
| Solid sphere       | Ta     | 0.15 – 20 C                 | 130 mAh g <sup>-1</sup> at 10 C                    | [2] <sup>2</sup>   |
| Mesoporous spheres | Zn     | 0.2 – 30 C                  | ~45 mAh g <sup>-1</sup> at 20 C                    | [3] <sup>3</sup>   |
| Mesoporous spheres | Cr, N  | 0.1 – 10 C                  | 127 mAh g <sup>-1</sup> at 10 C                    | [4] <sup>4</sup>   |
| Nanorod            | N      | 0.5 – 20 C                  | 131 mAh g <sup>-1</sup> at 20 C                    | [5] <sup>5</sup>   |
| Nanotube           | S      | 0.1 – 10 C                  | 167 mAh g <sup>-1</sup> at 10 C                    | [6] <sup>6</sup>   |
| Solid sphere       | Zr/F   | 1 – 10 C                    | ~140 mAh g <sup>-1</sup> at 10 C                   | [7] <sup>7</sup>   |
| Nanotube           | C      | 70 mA g <sup>-1</sup>       | ~100 mAh g <sup>-1</sup>                           | [8] <sup>8</sup>   |
| Solid sphere       | Sn     | 0.1 – 10 A g <sup>-1</sup>  | ~75 mAh g <sup>-1</sup> at 10 A g <sup>-1</sup>    | [9] <sup>9</sup>   |
| Nanosheet          | Mn     | 30 – 500 mA g <sup>-1</sup> | ~150 mAh g <sup>-1</sup> at 500 mA g <sup>-1</sup> | [10] <sup>10</sup> |
| Nanowire           | C      | 0.5 – 10 C                  | 172 mAh g <sup>-1</sup> at 10 C                    | [11] <sup>11</sup> |
| Core-shell sphere  | N      | 0.2 – 2 A g <sup>-1</sup>   | ~240 mAh g <sup>-1</sup> at 2 A g <sup>-1</sup>    | [12] <sup>12</sup> |
| Nanofiber          | Nb     | 0.05 – 5 C                  | 23 mAh g <sup>-1</sup> at 5 C                      | [13] <sup>13</sup> |
| Solid particles    | Mo/Nb  | 0.1 – 15 A g <sup>-1</sup>  | 42 mAh g <sup>-1</sup> at 15 A g <sup>-1</sup>     | [14] <sup>14</sup> |

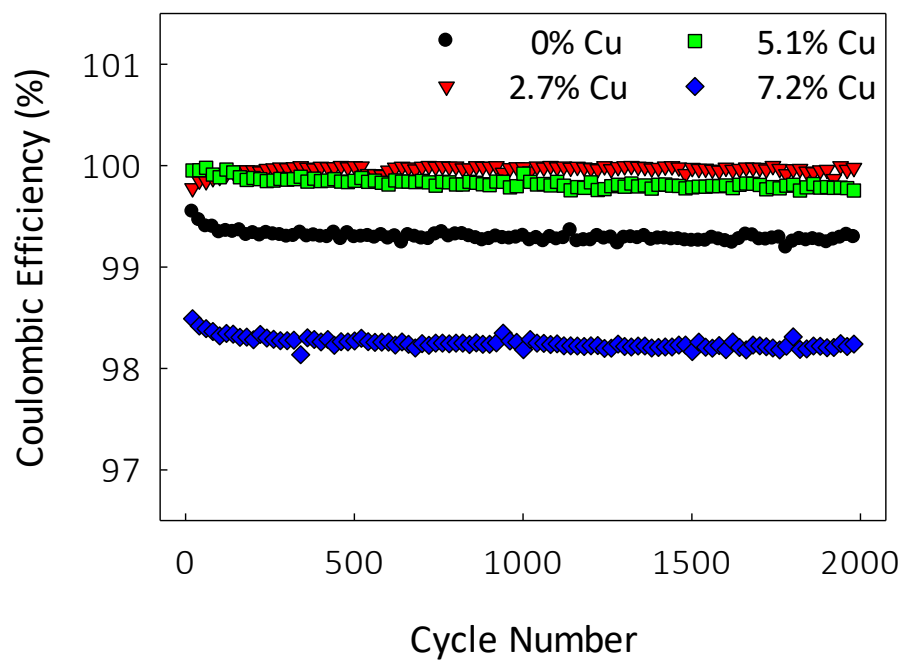

**Figure S1** Coulombic efficiencies of batteries over 2000 cycles at a charge rate of 10 C.

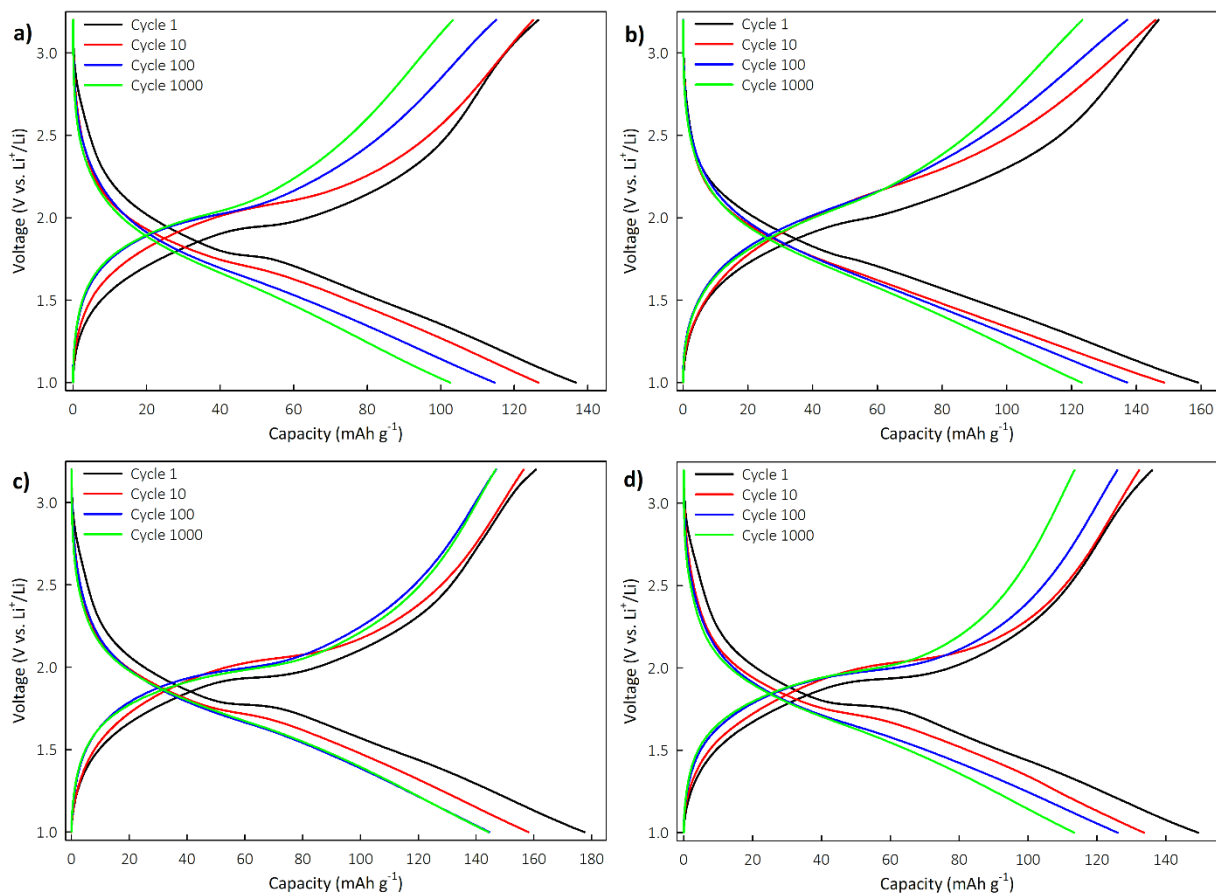

**Figure S2** Charge/discharge profiles of the 1<sup>st</sup>, 10<sup>th</sup>, 100<sup>th</sup>, and 1000<sup>th</sup> cycles for the a) 0% Cu, b) 2.7% Cu, c) 5.1% Cu, and d) 7.2% Cu electrodes during cycling at a rate of 10 C.

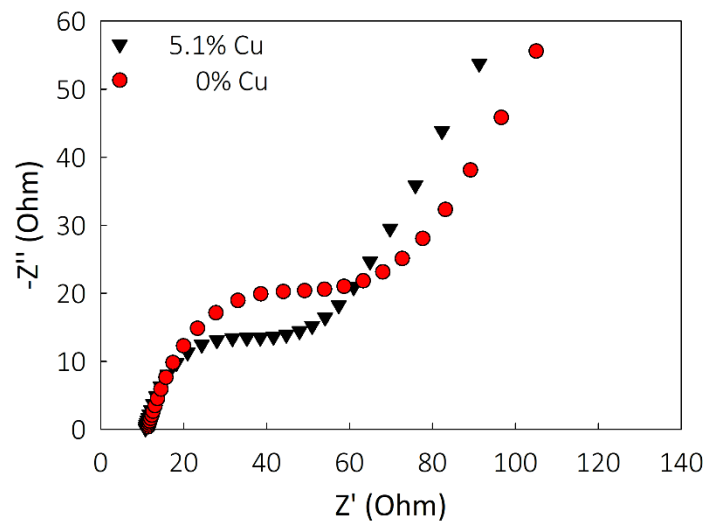

**Figure S3** Nyquist plots of the frequency dependent impedance of the 0% and 5.1% Cu electrodes.

## References

1. H. Usui, Y. Domi, S. Yoshioka, K. Kojima and H. Sakaguchi, *ACS Sustainable Chemistry & Engineering*, 2016, **4**, 6695-6702.
2. H. Usui, Y. Domi, K. Takama, Y. Tanaka and H. Sakaguchi, *ACS Applied Energy Materials*, 2019, **2**, 3056-3060.
3. Z. Ali, S. N. Cha, J. I. Sohn, I. Shakir, C. Yan, J. M. Kim and D. J. Kang, *Journal of Materials Chemistry*, 2012, **22**, 17625-17629.
4. Z. Bi, M. P. Paranthaman, B. Guo, R. R. Unocic, H. M. Meyer Iii, C. A. Bridges, X.-G. Sun and S. Dai, *Journal of Materials Chemistry A*, 2014, **2**, 1818-1824.
5. Y. Yang, X. Ji, M. Jing, H. Hou, Y. Zhu, L. Fang, X. Yang, Q. Chen and C. E. Banks, *Journal of Materials Chemistry A*, 2015, **3**, 5648-5655.
6. J. Ni, S. Fu, C. Wu, J. Maier, Y. Yu and L. Li, *Advanced Materials*, 2016, **28**, 2259-2265.
7. D. P. Opra, S. V. Gnedenkov, S. L. Sinebryukhov, E. I. Voit, A. A. Sokolov, A. Y. Ustinov and V. V. Zheleznov, *Progress in Natural Science: Materials International*, 2018, **28**, 542-547.
8. J. Xu, Y. Wang, Z. Li and W. F. Zhang, *Journal of Power Sources*, 2008, **175**, 903-908.
9. M. Lübke, I. Johnson, N. M. Makwana, D. Brett, P. Shearing, Z. Liu and J. A. Darr, *Journal of Power Sources*, 2015, **294**, 94-102.
10. W. Zhang, W. Zhou, J. H. Wright, Y. N. Kim, D. Liu and X. Xiao, *ACS Applied Materials & Interfaces*, 2014, **6**, 7292-7300.
11. S. Goriparti, E. Miele, M. Prato, A. Scarpellini, S. Marras, S. Monaco, A. Toma, G. C. Messina, A. Alabastri, F. D. Angelis, L. Manna, C. Capiglia and R. P. Zaccaria, *ACS Applied Materials & Interfaces*, 2015, **7**, 25139-25146.
12. M. Ren, H. Xu, F. Li, W. Liu, C. Gao, L. Su, G. Li and J. Hei, *Journal of Power Sources*, 2017, **353**, 237-244.
13. M. Fehse, S. Cavaliere, P. E. Lippens, I. Savych, A. Iadecola, L. Monconduit, D. J. Jones, J. Rozière, F. Fischer, C. Tessier and L. Stievano, *The Journal of Physical Chemistry C*, 2013, **117**, 13827-13835.
14. D. Bauer, A. J. Roberts, N. Matsumi and J. A. Darr, *Nanotechnology*, 2017, **28**, 195403.
